# Supplementary material
Source: PubMed Central journal article supplement (PMC4207965)
Supplement: NIHMS608473-supplement-1.pdf [file NIHMS608473-supplement-1.pdf]

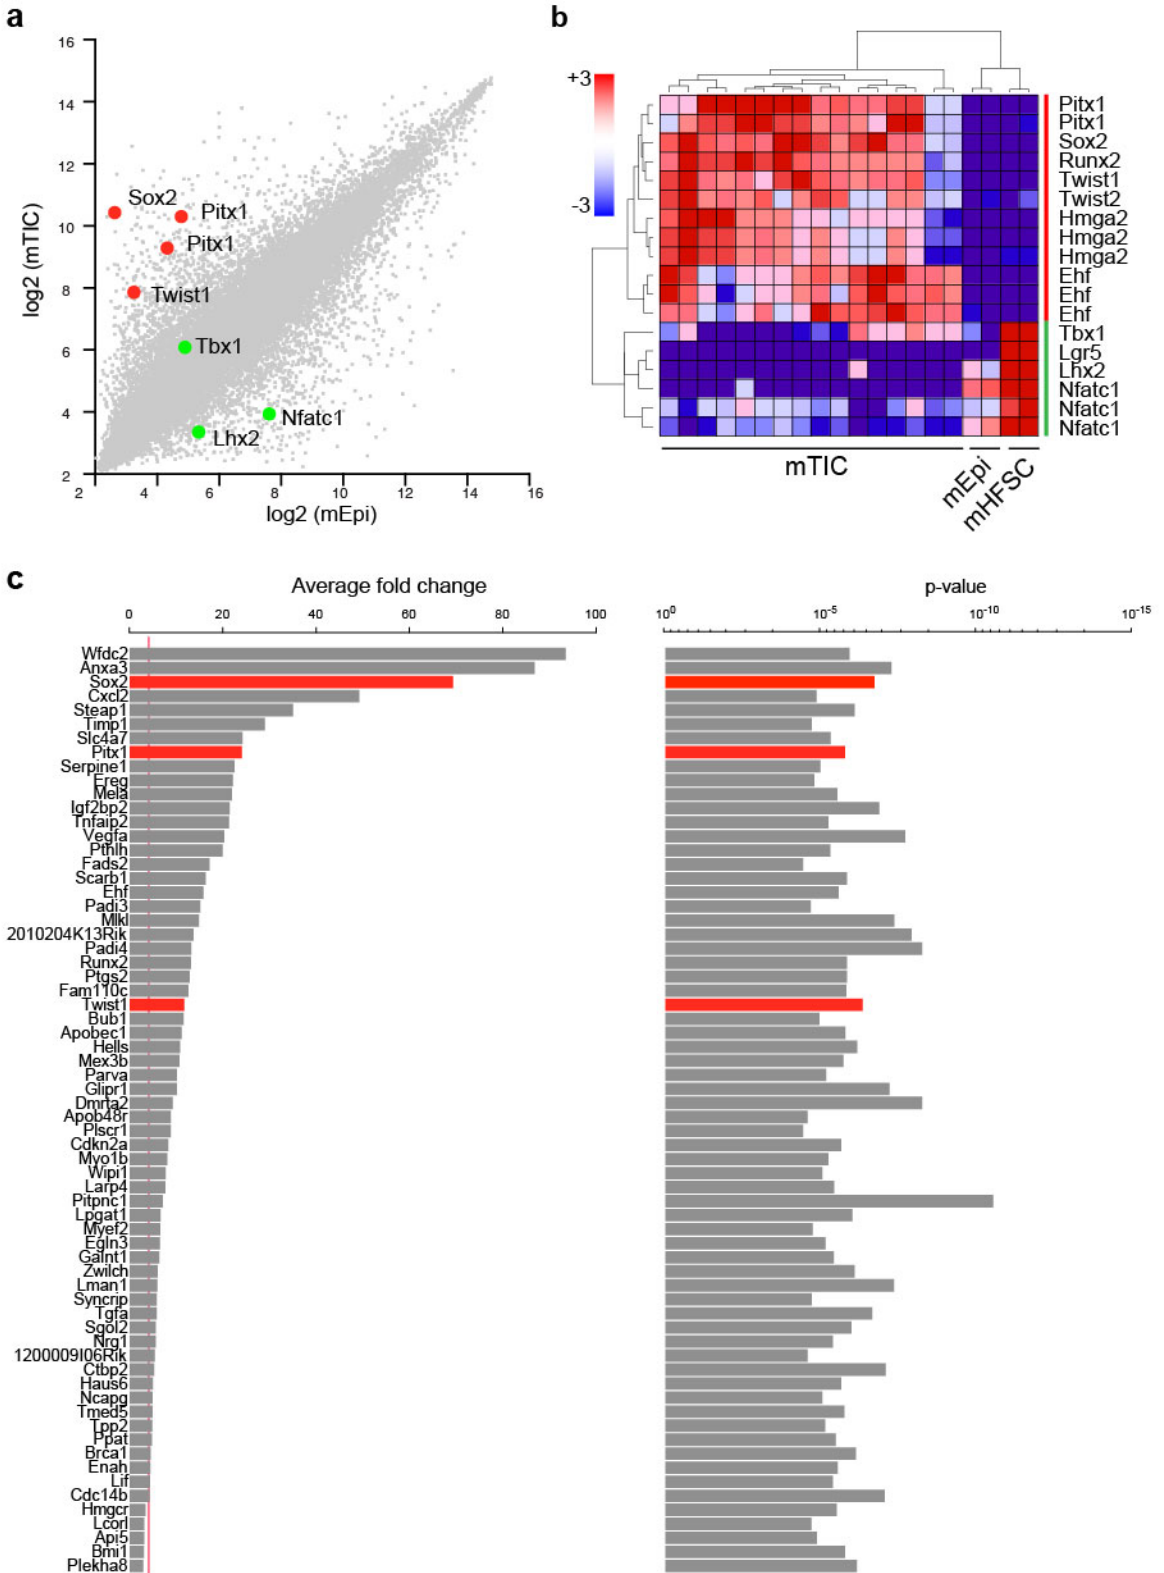

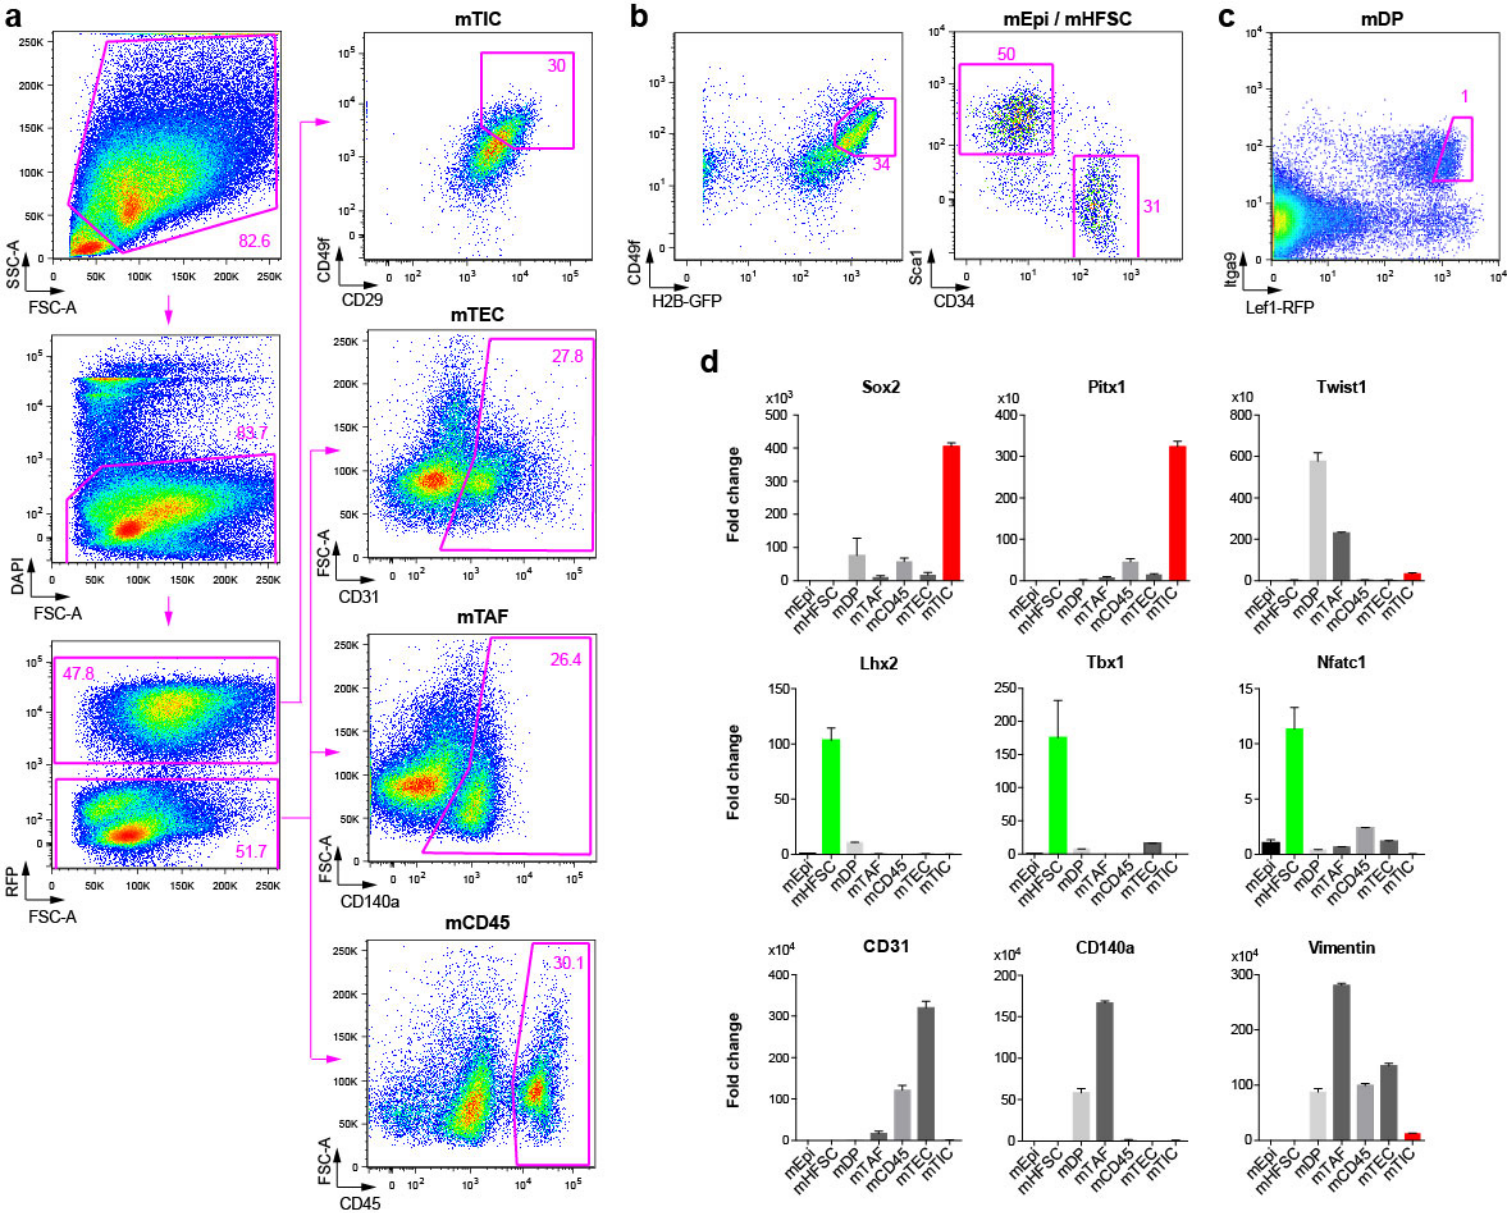

**Supplementary Figure 2: Expression of TIC specific transcription factors in mouse TICs, tumor-associated mesenchyme and normal skin epithelium.**

**a-b**, FACS-sorting strategy of murine (m) TIC, associated mesenchyme (fibroblasts, endothelial and inflammatory cells), Epi, HFSC and dermal papilla (DP) populations. **a**, TIC populations were collected from single, live (DAPI), RFP positive cells (tumor parenchyma labeled with retrovirus expressing RFP) with high  $\alpha 6$ - and  $\beta 1$ -integrin expression (CD49f and CD29). Tumor-associated endothelial cells (TECs) were isolated from single, live (DAPI), RFP negative and CD31 positive cell populations. Tumor-associated fibroblasts (TAFs) were sorted from single, live (DAPI), RFP negative and CD140a positive cell populations. Inflammatory cells were sorted from single, live (DAPI), RFP negative and CD45 positive cell populations. **b**, mEpi and mHFSCs were sorted from single, live (DAPI), lineage positive (K14-H2BGFP), CD49f-positive cells as the Sca1- and CD34-positive cell populations, respectively. **c**, mDP cells were isolated from single, live (DAPI), lineage positive (Lef1-RFP) and Itga9-positive cell populations. **d**, qRT-PCR analyses of the transcription factors Sox2, Pitx1 and Twist1, as well as standard markers for murine HFSCs (Lhx2, Tbx1, Nfatc1), endothelial cells (CD31) and fibroblasts/DP (CD140a, Vimentin) on FACS purified mEpi, mHFSC, mDP, mTAF, mCD45, mTEC, and mTIC populations. Bar graphs show mean with error bars indicating  $\pm$  s.d (n=3).

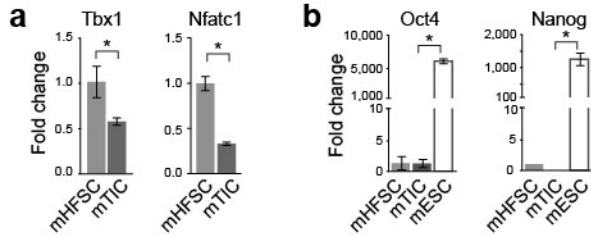

**Supplementary Figure 3:** Expression of HFSC and ESC markers in TIC cultures.

**a**, qRT-PCR analysis of Tbx1 and Nfatc1 on mTIC and mHFSC cultures. **b**, qRT-PCR analysis of embryonic stem cell (ESC) markers Oct4 and Nanog on mTIC, HFSC, and ESC cultures. Bar graphs show mean with error bars indicating  $\pm$  s.d. (n=3, \*P<0.05 Student's t-test).

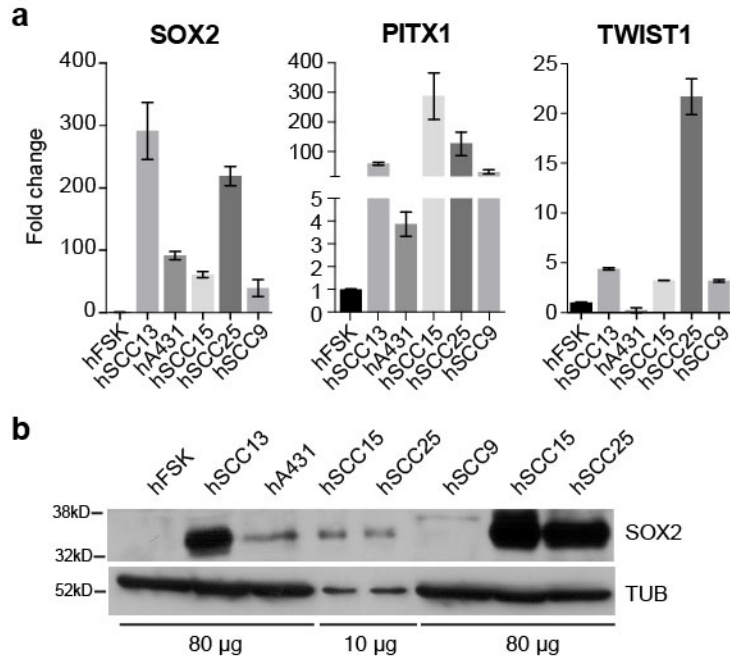

**Supplementary Figure 4: SOX2 is expressed in human SCC cell lines from different origins.**

**a**, qRT-PCR analyses for TIC-specific transcription factors on human (h) SCC cell lines compared to primary human foreskin keratinocyte (hFSK) cultures. Bar graphs show mean with error bars indicating  $\pm$  s.d. ( $n=3$ ). **b**, Western blot analysis of SOX2 on total protein lysates from human foreskin keratinocytes (hFSK) and human SCC cell lines. Tubulin serves as a loading control. Total protein amounts loaded per lane are indicated.

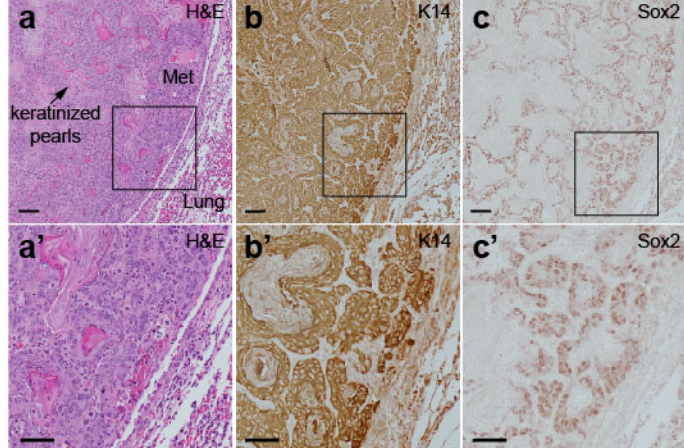

**Supplementary Figure 5:** Sox2 is expressed in spontaneous lung metastasis of mouse cutaneous SCCs. **a-c,** Representative images of spontaneous lung metastasis that developed in 5% of DMBA-treated mice bearing primary cutaneous SCCs. **a, a'**, Hematoxylin and eosin (H&E) staining shows an example of lung metastasis (Met) from cutaneous SCC. Note characteristic keratin pearls. **b, b'**, Immunohistochemistry for keratin 14 (K14), a marker for cutaneous SCCs. **c, c'**, Immunohistochemistry for Sox2 on spontaneous lung Met. Scale bars are 50 μm.

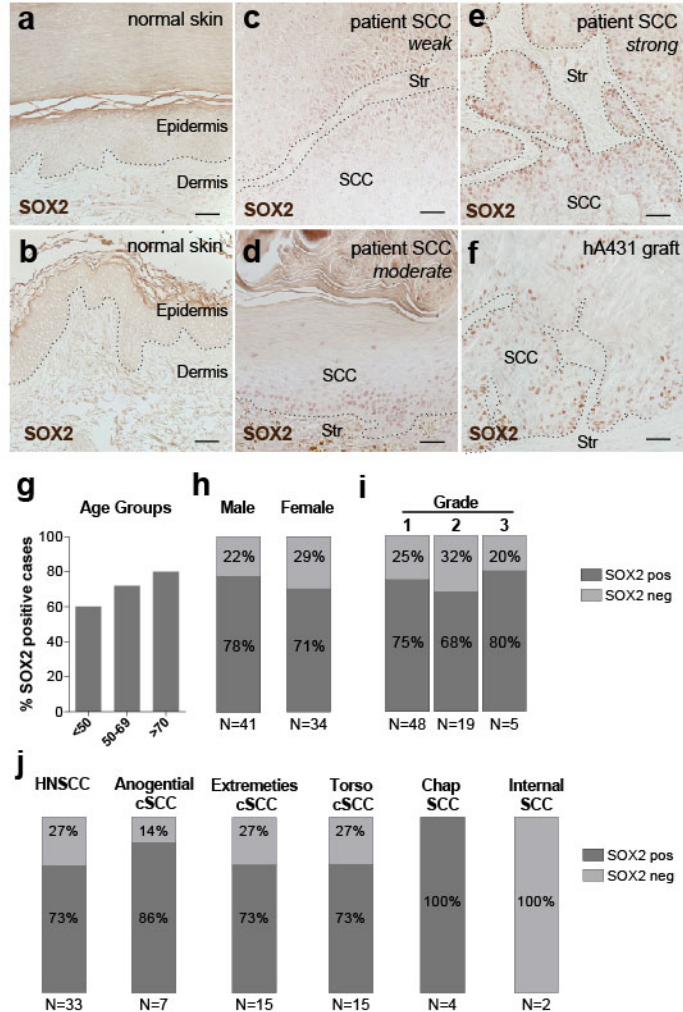

**Supplementary Figure 6:** Nuclear SOX2 is expressed in the majority of primary human patient SCCs. (a-f) Immunohistochemistry of SOX2 on normal skin (a,b), primary patient SCC samples on tissue microarrays (c-e) and A431 xenografts (f). Representative image of primary human patient SCC samples with weak (c), moderate (d) and strong (e) nuclear SOX2 staining. Note that SOX2 localizes predominantly to the tumor-stroma interface. (f) Xenograft of human SCC cell line A431 served as a positive SOX2 staining control. (a-f) Scale bar measures 50  $\mu$ m. Str, stroma. (g-j) Percentage of human patient SCC samples positive for nuclear SOX2 staining categorized by various patient parameters. (g) SOX2 positive SCC cases increase with age. Out of all malignant SCC cases, 60% (9/15) under the age of 50, 74% (26/35) between ages 50-69, and 80% (20/25) over the age of 69 were positive for nuclear SOX2 staining. (h) Percentage of SOX2 positive cases are similar between males and females. 70% (24/34) of malignant SCCs from female patients and 78% (32/41) from male patients were positive for nuclear SOX2 staining. (i) Nuclear SOX2 staining does not correlate with tumor grade. Out of all malignant SCC cases, 75% (36/48) of Grade 1, 68% (13/19) of Grade 2, and 80% (4/5) of Grade 3 were positive for nuclear SOX2 staining. (j) Positive nuclear SOX2 staining by anatomical location of human patient SCC samples. 73% (24/33) of head and neck SCCs, and 86% (6/7) of anogenital SCCs were positive for nuclear SOX2. 73% of cutaneous SCCs on extremities (11/15) and torso (11/15) showed positive nuclear SOX2 staining. 0% (0/2) of internal SCCs and 100% (4/4) of SCCs on chap had positive nuclear staining for SOX2.

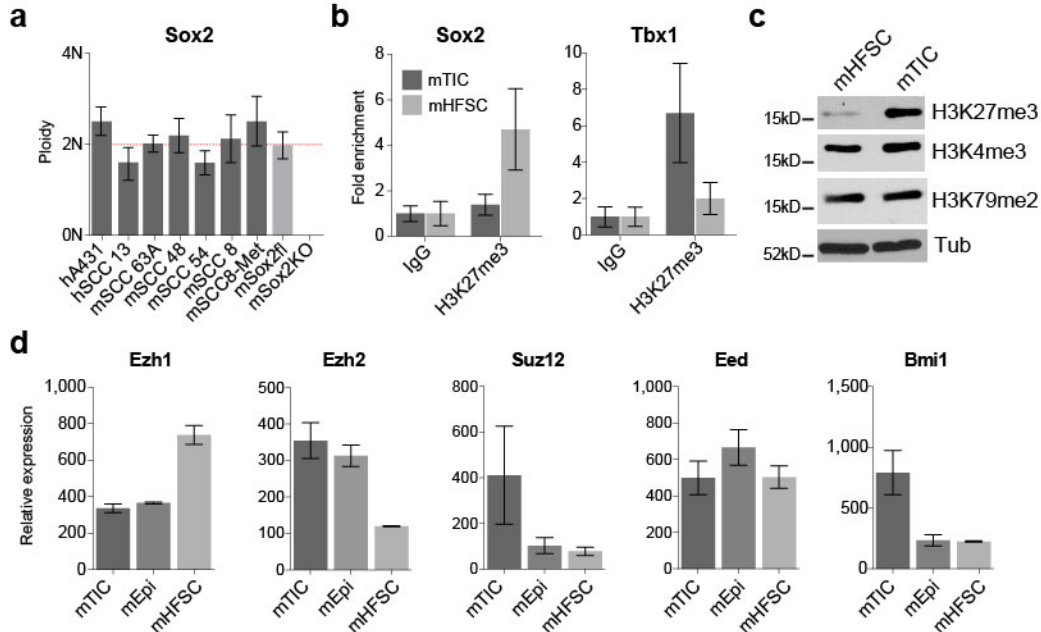

**Supplementary Figure 7: Sox2 de novo expression is mediated via epigenetic remodeling.**

**(a)** TaqMan copy number analysis of SOX2 on human (h) and mouse (m) SCC lines. Normal Sox2-flxed and Sox2-knock out keratinocytes were used as reference. **(b)** qRT-PCR analyses of chromatin samples from cultured mTICs and HFSCs after immunoprecipitation with anti-H3K27me3 and IgG control antibodies. Bar graphs showing average Fold enrichment of Sox2 and Tbx1 promoter sequence with error bars indicating + s.d. (n=3, \*P<0.05 Student's t-test). **(c)** Western blot analyses of H3K27me3, H3K4me3, H3K79me2 expression on total protein extracts from mHFSC and mTIC cultures.  $\beta$ -tubulin served as a loading control. **(d)** Relative expression levels of Polycomb Repressive Complex components in freshly isolated mouse tumor initiating cells (TIC), skin epithelial cells (Epi,  $\alpha$ 6-integrin high/CD34 low) and hair follicle stem cells (HFSC,  $\alpha$ 6-integrin high/CD34 high). Bar graphs show mean Affymetrix expression values with error bars indicating + s.d (n=16 mTIC; n=2 mEpi; n=2 mHFSC).

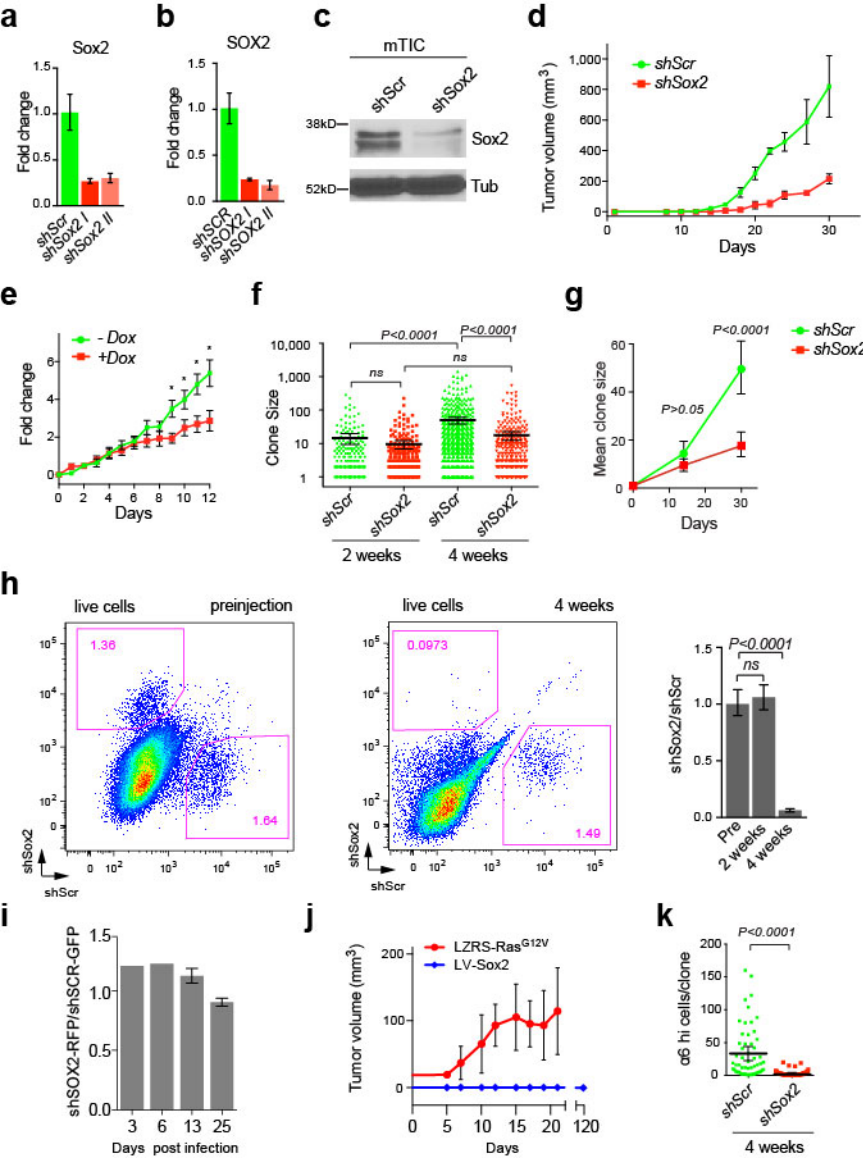



**Supplementary Figure 8: Sox2 downregulation reduces cutaneous SCC growth and clonal expansion**

**(a)** qRT-PCR analysis of Sox2 on mouse tumor initiating cells (mTICs) infected with lentivirus expressing short hairpin RNA (shRNA) against Sox2 along with nuclear red fluorescent protein (H2B-RFP) or scrambled control shRNA along with nuclear green fluorescent protein (H2B-GFP). **(b)** qRT-PCR analysis of Sox2 on human SCC cells infected with shSCR;H2B-GFP or two independent shSOX2;H2B-RFP expressing lenti viruses. **(a-b)** Bar graphs show average fold change with error bars indicating  $\pm$  s.d. **(c)** Western blot analysis of Sox2 protein on shScr and shSox2 transduced mouse mTICs.  $\beta$ -Tubulin (Tub) served as loading control. **(d)** Tumor growth curve of mouse TICs infected with lentivirus expressing shSox2;H2B-RFP or scrambled shScr;H2BGFP control followed by transplantation onto Nude recipient mice. Measurements are mean with error bars indicating  $\pm$  s.e.m. (n=4). **(e)** Doxycycline-inducible knockdown of Sox2 in established mouse SCC grafts. Data are represented as mean with error bars indicating  $\pm$  s.e.m. (n=10, \*P<0.05, Student's t-test). **(f-g)** Analysis of clonal growth competition assay at 2 and 4 weeks after intradermal transplantation when 1-2% of mTICs have been transduced with shSox2;H2B-RFP and shSCR;H2B-GFP (n=6). **(f)** Scatter plots illustrate clone size distributions. Horizontal lines represent mean with error bars indicating  $\pm$  95% CI. **(g)** Line graphs showing average clone size as a function of time ( $\pm$  s.e.m). **(f-g)** P values were determined by Mann-Whitney non-parametric t-tests. **(h)** Representative scatter plot of flow cytometry analysis of clonal competition at different time points (pre-injection and 4 weeks post-transplantation). Bar graphs show mean ratio of shSox2;H2B-RFP to shScr;H2B-GFP cells per tumor as measured by flow cytometry. **(i)** Flow cytometry analysis of clonal competition at different time points in human A431 SCC cultures. Bar graphs show mean ratio with error bars indicating  $\pm$  s.e.m. (n=6). **(j)** Tumor growth curves of hair follicle stem cells (HFSCs) after infection with LZRS-RasG12V or lentivirus expressing Sox2 followed by intradermal injection into Nude mice. **(k)** Scatter plot showing the number of  $\alpha$ 6-integrin expressing SCC cells per shScr-GFP and shSox2-RFP clone 4 weeks after transplantation. Horizontal bar shows mean with error bars indicating  $\pm$  95% CI. Statistical significance was determined by Mann-Whitney non-parametric t-test.

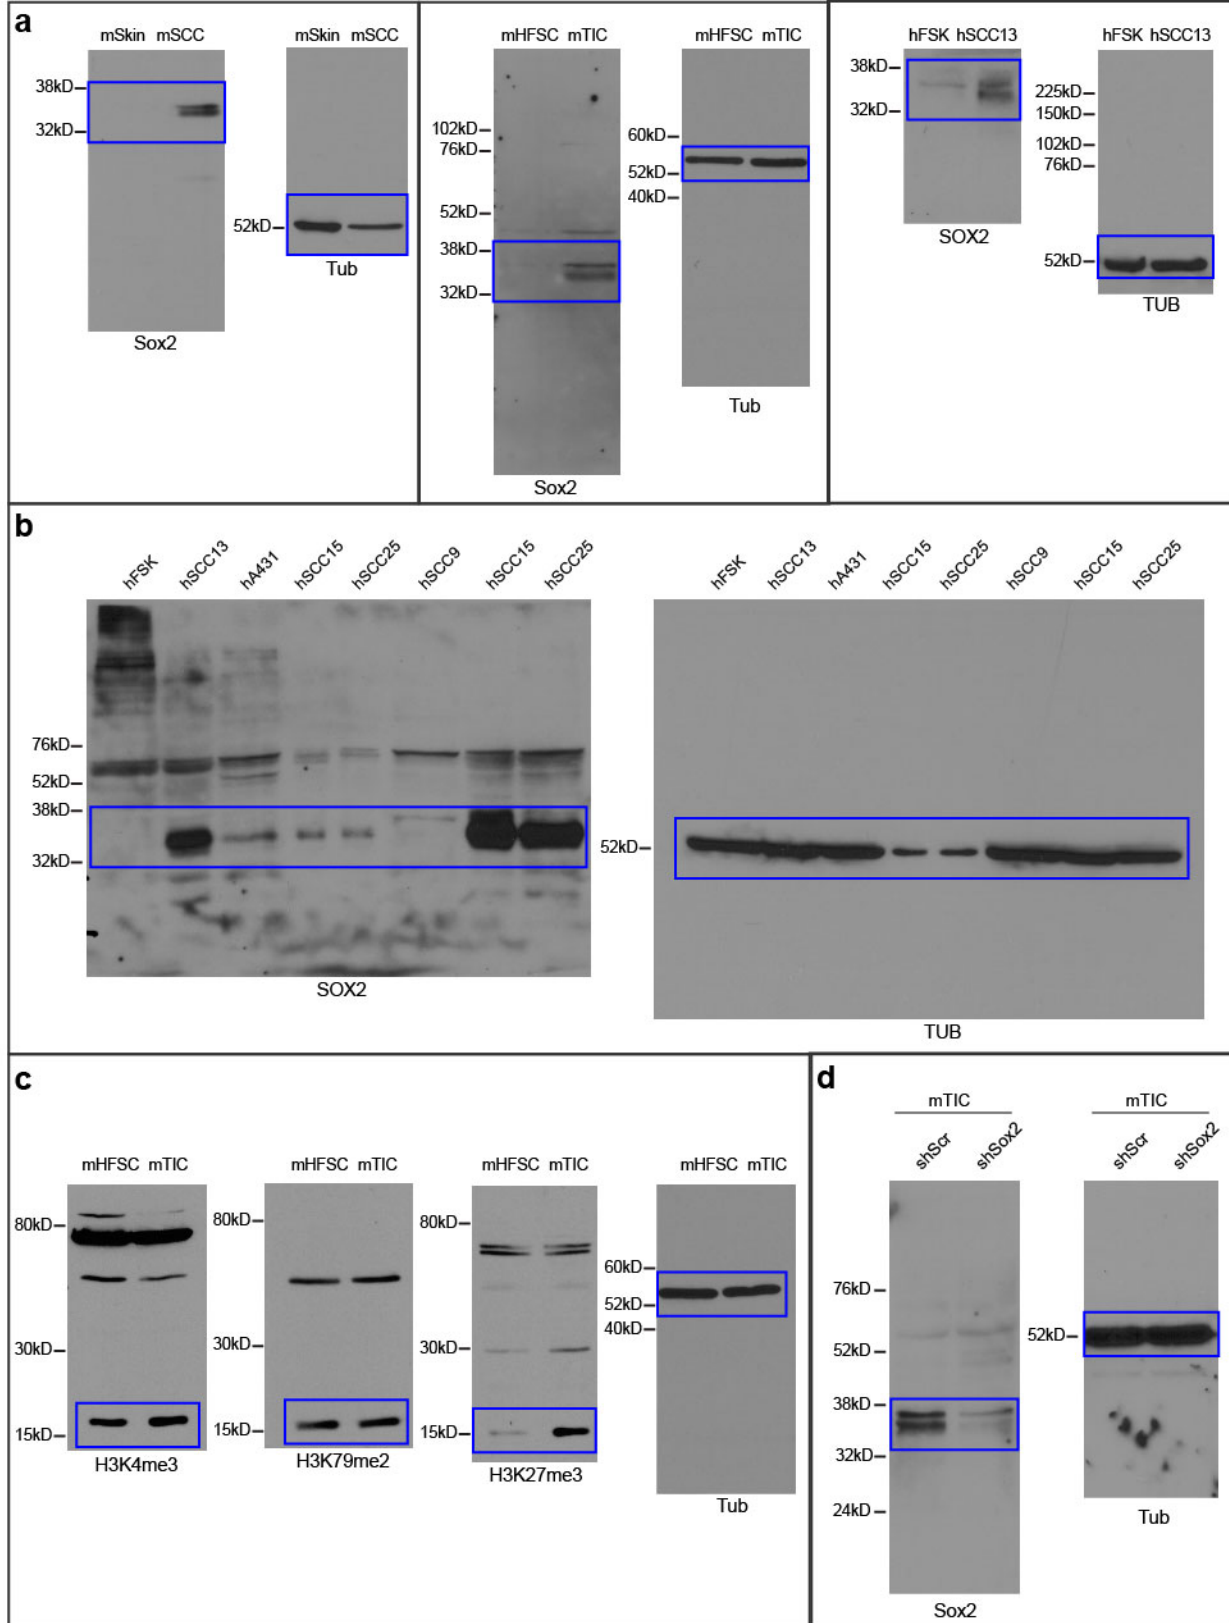

**Supplementary Figure 9:** Expanded views of western blot films.

**a,** Figure 1e-g blots.

**b,** Supplementary Figure 4b blots.

**c,** Supplementary Figure 7c blots.

**d,** Supplementary Figure 8c blots.

**Supplementary Table 1: Full sequences of shRNAs**

| Name                   | Sequence                                                   |
|------------------------|------------------------------------------------------------|
| shScramble<br>SHC002   | CCGGCAACAAGATGAAGAGCACCAACTCGAGTTGGTGCTCTTCATCTTGTTGTTTT   |
| Sox2<br>TRCN0000424718 | CCGGAGGAGCACCCGGATTATAAATCTCGAGATTATAATCCGGGTGCTCCTTTTTTG  |
| Sox2<br>TRCN0000085748 | CCGGCGAGATAAACATGGCAATCAACTCGAGTTGATTGCCATGTTTATCTCGTTTTTG |
| SOX2<br>TRCN0000231643 | CCGGGTACAGTATTTATCGAGATAACTCGAGTTATCTCGATAAATACTGTACTTTTTG |
| SOX2<br>TRCN0000257314 | CCGGTGGACAGTTACGCGCACATGACTCGAGTCATGTGCGCGTAACTGTCCATTTTTG |
| NRP1<br>TRCN0000322980 | CCGGTATACTAGAATCACCGCATTCTCGAGAAATGCGGTGATTCTAGTATATTTTTG  |

**Supplementary Table 2: Antibodies with dilutions**

| Name                                               | Catalogue Number & Manufacturer | Dilution (Application)          |
|----------------------------------------------------|---------------------------------|---------------------------------|
| rabbit monoclonal anti-Sox2                        | ab92494, Abcam                  | 1:1000 (IF & WB) or 1:100 (IHC) |
| rat anti-mouse CD104/ $\beta$ 4                    | 553745, BD Pharmingen           | 1:1000 (IF)                     |
| rat anti-human/mouse CD49f/ $\alpha$ 6-PerCP-Cy5.5 | 313617, BioLegend               | 1:200 (IF & Flow)               |
| rabbit monoclonal anti-Survivin                    | 2808, Cell Signaling            | 1:1000 (IF)                     |
| rabbit anti-phospho Ki67                           | KI67P-CE, Novo Castra-Leica     | 1:1000 (IF)                     |
| rabbit anti-Casp-3                                 | AF835, R&D Systems              | 1:1000 (IF)                     |
| mouse anti-NuMa                                    | 610561, BD Biosciences          | 1:500 (IF)                      |
| anti-CD31                                          | 13031982, eBioscience           | 1:200 (IF)                      |
| rabbit anti-K14                                    | PRB-155P, Covance               | 1:1000 (IHC)                    |
| rat monoclonal anti-Nidogen                        | Sc-33706, Santa Cruz            | 1:1000 (IF)                     |
| anti-phospho-Histone H3 (Ser10)                    | 06-570, Millipore               | 1:1000 (IF)                     |
| rabbit anti-Sox2                                   | 2748, Cell Signaling            | 1:500 (WB)                      |
| mouse monoclonal anti- $\beta$ -tubulin            | T5201, Sigma                    | 1:10,000 (WB)                   |
| rabbit polyclonal anti-H3K4me3                     | ab8580, Abcam                   | 1:1000 (WB)                     |
| rabbit polyclonal anti-H3K27me3                    | 07-449, Millipore               | 1:1000 (WB)                     |

|                                                  |                         |              |
|--------------------------------------------------|-------------------------|--------------|
| rabbit polyclonal anti-H3K79me2                  | ab3594, Abcam           | 1:1000 (WB)  |
| hamster anti-rat/mouse CD29/ $\beta$ 1-Alexa 700 | 102218, BioLegend       | 1:200 (Flow) |
| mouse anti-human CD29/ $\beta$ 1-Alexa 700       | 303020, BioLegend       | 1:200 (Flow) |
| anti-mouse CD45-Biotin                           | 553078, BD Pharmingen   | 1:200 (Flow) |
| anti-human CD45-Biotin                           | 13-0459-82, BioLegend   | 1:200 (Flow) |
| anti-mouse CD31-Biotin                           | 13-0311-85, eBioscience | 1:200 (Flow) |
| anti-human CD31-Biotin                           | 13-0319-82, eBioscience | 1:200 (Flow) |
| anti-CD11b-Biotin                                | BAM 1124, R&D Systems   | 1:200 (Flow) |
| FITC-Streptavidin                                | 11-4317-87, eBioscience | 1:200 (Flow) |
| rat anti-mouse CD140a-APC                        | 171401-81, eBioscience  | 1:200 (Flow) |
| rat anti-mouse CD31-PerCP-eFluor 710             | 46-0311-80, eBioscience | 1:200 (Flow) |
| APC-Streptavidin                                 | 17-4317-82, eBioscience | 1:200 (Flow) |
| Alexa 488 goat anti-rabbit IgG (H+L)             | A11034, Invitrogen      | 1:1000 (IF)  |
| FITC goat anti-rabbit IgG (H+L)                  | 111-095-144, Jackson    | 1:1000 (IF)  |
| Alexa 568 donkey anti-rabbit IgG (H+L)           | A10042, Invitrogen      | 1:1000 (IF)  |

|                                          |                              |             |
|------------------------------------------|------------------------------|-------------|
| DyLight 649 goat anti-rat IgG            | 405411, BioLegend            | 1:1000 (IF) |
| DyLight 405 donkey anti-rabbit IgG (H+L) | 711-475-152, Jackson         | 1:1000 (IF) |
| biotinylated horse anti-rabbit IgG (H+L) | BA-1100, Vector Laboratories | 1:200 (IHC) |
| HRP donkey anti-rabbit IgG (H+L)         | 711-035-152, Jackson         | 1:3000 (WB) |
| HRP donkey anti-mouse IgG (H+L)          | 715-035-151, Jackson         | 1:2000 (WB) |

Where IF = immunofluorescence; WB = western blotting; IHC = immunohistochemistry; Flow = flow cytometry analysis or sorting

**Supplementary Table 3: Sequences of qRT-PCR primers**

| Name         | Sequence                                                        |
|--------------|-----------------------------------------------------------------|
| Sox2 (a)     | F= 5'GGGGCAGCGGCGTAAGA<br>R= 5'AGCCTCCGGGAAGCGTGTA              |
| SOX2         | F= 5'CGGCGGCAACCAGAAAAACA<br>R= 5'TGCCCGCGGGACCACAC             |
| Rplp0        | F= 5'GTGCCATCGCCCCGTGTG<br>R= 5'TGGATGATCAGCCCGAAGGAGA          |
| RPLP0        | F= 5'GGGGGAATGTGGGCTTTGTGTT<br>R= 5'GGTGCCCTGGAGATTTTAGTGTT     |
| Vegfa        | F= 5'GAAGCTACTGCCGTCCGATTGAGA<br>R= 5'GTGCTGGCTTTGGTGAGGTTTGTAT |
| Nrp1         | F= 5'CCACCCCGGCTCGTATGTCAC<br>R= 5'TTCCGAAGGGGGCGATTTAGG        |
| Nrp2         | F=5'CTTTGCAGAAGACACCACCA<br>R=5'CAGTTCTGGTGGGAGGGATA            |
| Pitx1        | F= 5'CCGGGATGCCAGGAAGAGC<br>R= 5'CACGGGCAGGCGGACAGT             |
| PITX1        | F= 5'GGCCGGGGGAGGACGAC<br>R= 5'CAACGCCCGCCCAACA                 |
| Twist1 (a)   | F= 5'GGCAAGCGCGGCAAGAAAT<br>R= 5'GAGGGCAGCGTGGGGATGAT           |
| TWIST1       | F= 5'GGCAAGCGCGGCAAGAAGT<br>R= 5'GAGGGCAGCGTGGGGATGAT           |
| Ereg         | F= 5'CTTCGTCTTTGTTTGCCTTTGTG<br>R= 5'CCTCCCTGACCTGGTATGTGTTCC   |
| Tgf $\alpha$ | F= 5'CCGTTTTTTGGTGCAGGAAGAG<br>R= 5'GCGAACACCCACGTACCCAGAGT     |
| EgfR         | F= 5'CTACCGCCTCCCAGACAGACGAC<br>R= 5'GCGCCGGCAACGACGAG          |
| Spp1         | F= 5'CCAGCAGCTCACACTGAAGA<br>R= 5'CCAAACAGGCAAAAGCAAAT          |
| Pitpnc1      | F= 5'ATGCTGCTCAAGGAGTACCG<br>R= 5'TAGGCAGCTTGCTGTTGAGA          |
| Igf2bp2      | F= 5'CTACTCAAGTCCGGCTACGC<br>R= 5'TGTCCCATATTCAGCCAACA          |
| Sox2 (b)     | F= 5'TACTGGCAAGACCGTTTTTCGTC<br>R= 5'AAGCAGTTGGTGGTGCAGGATG     |
| Twist1 (b)   | F= 5'AGGCCGGAGACCTAGATGTCATT<br>R= 5'CAGCGATGCCTTTCTGTCA        |
| CD31         | F= 5'GTCATGGCCATGGTTCGAGTA<br>R= 5'CTCCTCGGCGATCTTGCTGAA        |
| CD140a       | F= 5'ACGCATGCGGGTGGACTC<br>R= 5'GATACCCGGAGCGTGTGTCAGTTAC       |

|                   |                                                                   |
|-------------------|-------------------------------------------------------------------|
| Vimentin          | F= 5'GTGATGTGCGCCAGCAGTATG<br>R= 5'TGCAGGCGGCCAATAGTGT            |
| Lhx2 <sup>6</sup> | F= 5'CCTACTACAACGGCGTGGGCACTGT<br>R= 5'GTCACGATCCAGGTGTTTCAGCATCG |
| Enpp2             | F= 5'ACGGCTAGTCTTCCGGTAGAAATC<br>R= 5'CGCCCTGATGTCCGTGTATCT       |
| Akp2              | F= 5'GTGGCGGCGGAAATACA<br>R= 5'ATGTCCCCGGGCTCAAAGA                |
| Wif1              | F= CTGCCGAAATGGAGGTAAATGC<br>R= AATTCAGGCCGGCGTTCTAAAG            |
| Nfact1            | F= ACATAGCCTCCTGCTGGAAA<br>R= AAGAGGGGTCTGGAGCAAAT                |
| Tbx1              | F= CACAGATATCAGCCCCGATT<br>R= GCGTGTCTCCTCAAACACAA                |



**Supplementary Table 4: Sequences of ChIP-PCR primers**

| Sox2 Binding at | Sequence                                                  |
|-----------------|-----------------------------------------------------------|
| Nrp1            | F= 5'CCGACTGCCATACAGAAAGC<br>R= 5'TGGCTGTGACACTGTTGTGA    |
| Spp1            | F= 5'GGAGCATTGCAAAATGTGAA<br>R= 5'GTAAGCAGTGCCAGGTGTGA    |
| Pitpnc1         | F= 5'AGGAGGCAATTAGCAGGACTC<br>R= 5'CCAGCAGGGTAGTCTCTTGC   |
| Igf2bp2         | F= 5'CAGTGGTGTAGCCTCTGCAA<br>R= 5'TAACCATTTCATCCCCACTG    |
| Pitx1           | F= 5'TCGGGGTTGTTTTGTTTTGT<br>R= 5'GACACCTCAGCCCAGAGC      |
| NRP1            | F= 5'TCAGGAGTGAGTAAACAGGCAAT<br>R= 5'GGAAACCTGGGTACCTGGAG |

  

| H3K27me3 Binding at | Sequence                                                   |
|---------------------|------------------------------------------------------------|
| Sox2                | F= 5' CCCATTTATTCCCTGACAGC<br>R= 5' TTGCAAACACTCTCTTCTCTGC |
| Tbx1                | F= 5' GTCTCCTTTCTCTCGCTCCA<br>R= 5' CGGAAGGGAAGACATGAAAA   |
